# Supplementary material
Source: Springer Nature journal article supplement (https://www.springermedizin.de/resource/supplementary/12891_2010_919_MOESM3_ESM.pdf/9506708)
Supplement: MOESM3 [file 9506708]

|                                  |                                   |                                   |
|----------------------------------|-----------------------------------|-----------------------------------|
| 9 x 7 min/wk<br>with supervision | 3 x 20 min/wk<br>with supervision | 1 x 60 min/wk<br>with supervision |
|----------------------------------|-----------------------------------|-----------------------------------|

*effect of time-wise combination*

|                                      |
|--------------------------------------|
| 3 x 20 min/wk<br>minimal supervision |
|--------------------------------------|

*effect of supervision*
